# Supplementary material for: Enhanced antibacterial activity of a novel silver-based metal organic framework towards multidrug-resistant Klebsiella pneumonia
Source: Royal Society of Chemistry journal article supplement (doi:10.1039/d4na00037d), 2024-01-01
Supplement: d4na00037d1.pdf [file d4na00037d1.pdf]

## Electronic Supplementary Information

### **Enhanced Antibacterial activity of a Novel Silver-based Metal Organic Framework Towards Multidrug-resistant *Klebsiella pneumonia***

Payam B. Hassan,<sup>a</sup> Sameera Sh. Mohammed Ameen<sup>b</sup>, Lana Mohammed<sup>c</sup>, Sirwan M. Muhammed Ameen,<sup>a</sup> and Khalid M. Omer<sup>d\*</sup>

<sup>a</sup> Department of Biology, College of Science, University of Sulaimani, Sulaymaniyah, 46002, Kurdistan region, Iraq.

<sup>b</sup> Department of Chemistry, College of Science, University of Zakho, Zakho, Kurdistan region - Iraq

<sup>c</sup> Department of Medical Laboratory, College of Health and Medical Technology, Sulaimani Polytechnic University, Sulaymaniyah, Iraq.

<sup>d</sup> Department of Chemistry, College of Science, University of Sulaimani, Qliasan St. 46002, Sulaymaniyah, Kurdistan region, Iraq.

Corresponding author: [khalid.omer@univsul.edu.iq](mailto:khalid.omer@univsul.edu.iq)

## Chemicals

All materials and solvents were of analytical grades and used without purification. AgNO<sub>3</sub> (99%), triethylamine (TEA), methanol, and terephthalic acid (TP, 98.9%; Sigma-Aldrich (Germany)). Thiobarbituric acid (TBA; Canvax, Spain)

## Instrumentations and characterizations

The following instruments were used for characterization and analysis of Ag-MOFs: field emission scanning electron microscopy (FESEM) and energy dispersive spectrum (EDS) (MIRA III, TESCAN, Czech), transmission electron microscopy (TEM) (TEC9G20, FEI, USA) at 200 KV, powder X-ray diffraction (PW1730, Netherland), Fourier transform infrared spectra (FT-IR) (IRAFFinity-1, Shimadzu). Powder X-ray diffractometer (PXRD) using D8-advanced diffractometer (Philips, PW1730, Netherlands).

**Table S1.** Antibiotic susceptibility test of *K. pneumoniae* KPB11 by VITEK2 system and Kirby-Bauer disk diffusion method.

| <b>Antimicrobial</b>        | <b>MIC</b> | <b>Interpretation</b> | <b>Antimicrobial</b>              | <b>MIC</b> | <b>Interpretation</b> |
|-----------------------------|------------|-----------------------|-----------------------------------|------------|-----------------------|
| Amoxicillin/Clavulanic Acid | >= 32      | R                     | Imipenem                          | >= 16      | R                     |
| Piperacillin/Tazobactam     | >= 128     | R                     | Meropenem                         | >= 16      | R                     |
| Cefazolin                   | >= 64      | R                     | Amikacin                          | 32         | I                     |
| Cefuroxime                  | >= 64      | R                     | Gentamicin                        | 8          | I                     |
| Cefuroxime Axetil           | >= 64      | R                     | Ciprofloxacin                     | >= 4       | R                     |
| Ceftazidime                 | >= 64      | R                     | Fosfomycin                        |            |                       |
| Ceftriaxone                 | >= 64      | R                     | Nitrofurantoin                    | 128        | R                     |
| Cefepime                    | >= 32      | R                     | Trimethoprim/<br>Sulfamethoxazole | >= 320     | R                     |
| Ertapenem                   | >= 8       | R                     |                                   |            |                       |

| <b>Antimicrobials</b>    | <b>Zone size</b> | <b>interpretation</b> | <b>Antimicrobials</b> | <b>Zone size</b> | <b>interpretation</b> |
|--------------------------|------------------|-----------------------|-----------------------|------------------|-----------------------|
| Cefixime                 | 0                | R                     | Tetracycline          | 0                | R                     |
| Cefdinir                 | 0                | R                     | Tigecycline           | 20               | S                     |
| Cefpodoxime –clavulanate | 0                | R                     | Fosfomycin            | 0                | R                     |
| Cefpodoxime              | 0                | R                     | Azithromycin          | 0                | R                     |
| Colistin                 | 17               | S                     | Clarithromycin        | 0                | R                     |
| Streptomycin             | 19               | S                     |                       |                  |                       |
| Moxifloxacin             | 0                | R                     |                       |                  |                       |
| Levofloxacin             | 0                | R                     |                       |                  |                       |
| Doxycycline              | 0                | R                     |                       |                  |                       |

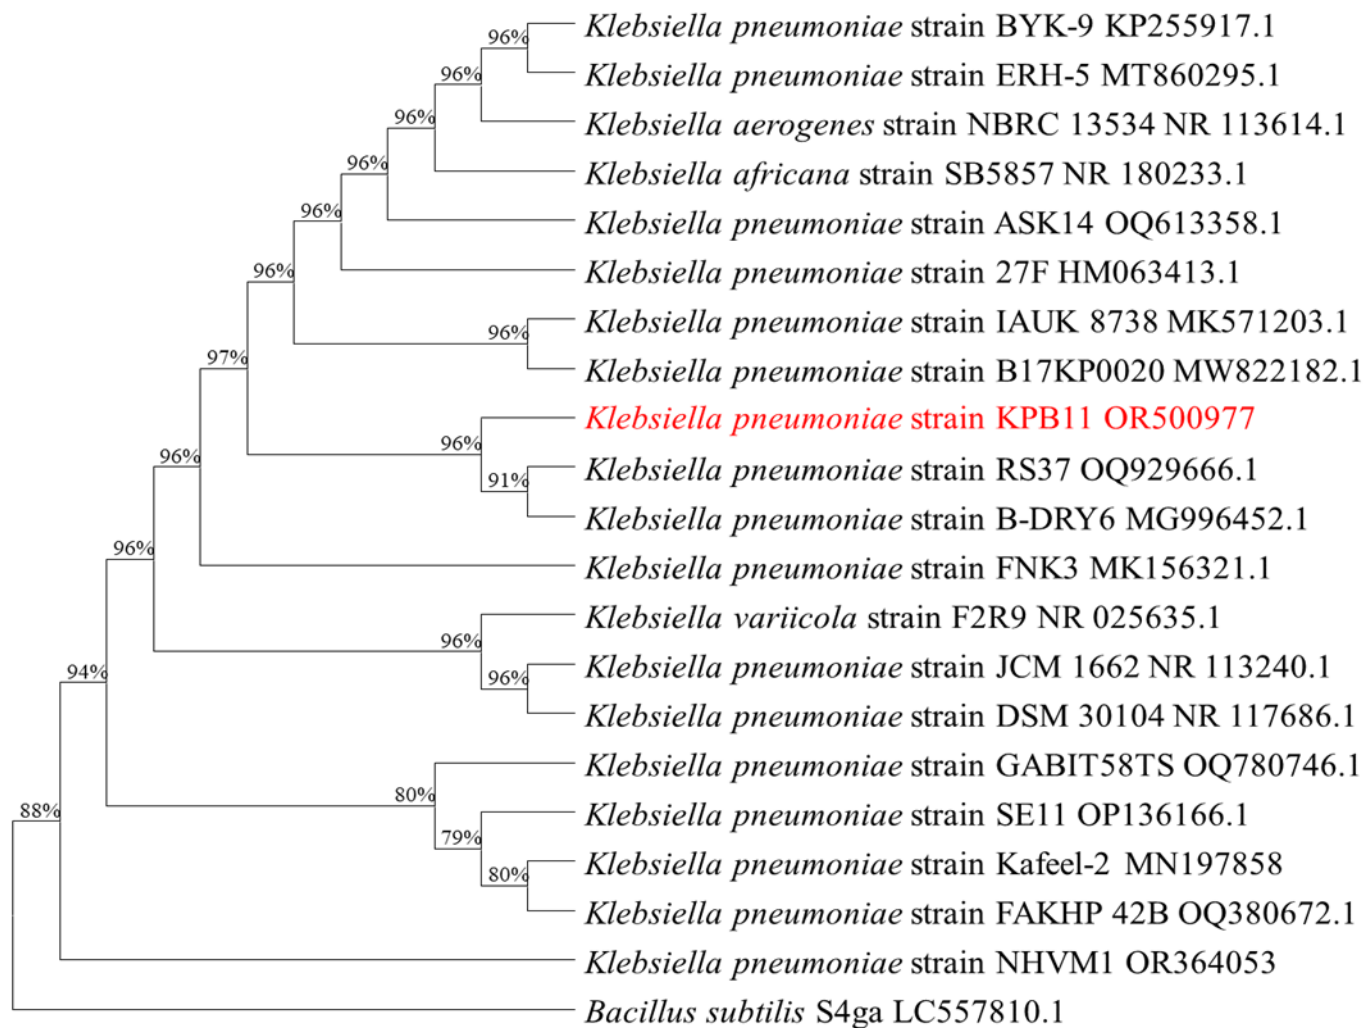

**Figure S1.** Phylogenetic tree of *K. pneumoniae* KPB11 based on partial 16S rRNA gene sequencing.
